# Supplementary material
Source: publisher figshare collection journal article supplement (https://gsajournals.figshare.com/ndownloader/files/26551541)
Supplement: Supplementary file 1 [file 26551541]

## Sheet: Sheet1
	Proteome in cytoophidium group	Proteome in disrupted cytoophidium group	Proteome in both
	CG6340-RB	Df31	Ssb-c31a
	CG8675-RA	ras	CG7637
	ytr	hoip	RpS20
	Act57B	sqd	CG1648
	x16	cib	RpS9
	Rbp1-RA	Rfabg	Nop56
	Tm2	TER94	RpS13
	snRNP-U1-70K	RpS4	CG31664
	Act88F-RA	Sam-S	TppII
	eIF3-S8	Fib-RA	RpL14
	SC35	Yp1	Pen
	Mur2B		dhd
	RpS30		capt
	eIF-3p66		CG7777-RB
	up		eIF3-S9
	RpL35		Hsc70Cb
	wupA		Tudor-SN
	RpL19		rgn
	Catsup		Nsun2
	RpL13		nudC
	eIF3-S10		Mhc
	RpL31		RpS17
	me31B		D1
	eIF-3p40		Mapmodulin
	Ars2-RC		RpS15Aa
	SF2		RpL11
	dre4		anon1A3
	TpnC73F		Nacalpha
	RpL32		RpS8
	Act5C		RpL30
	eIF-1A		smt3
	RpL27A		RpS7
	B52		RpL9
	HmgZ		Gpdh
	CTPsyn		Mi-2
	RpL13A		CG17259
	sesB		RpL6
	Zip99C		Trip1
	Moe		CG5355
	RpL37A		NHP2
	RpL17		Rpt4
	RpS15		Tcp-1eta
	Slbp		CG3509
	zip		PyK
	CG5174		RnrL
	RpL37a		Acn
	Pdcd4		Yp2
	Ssrp		RpL21
	Sec61alpha-RA		eIF-4a-RD
	eIF3-S4-1		RpS14b
	vig2		Cp15
	cype		vig
	RpL28		14-3-3zeta
	CG5642		RpL7
	RpS25		Rtnl1
	RpS18-RB		RpL3-RA
	Mp20		RpL27
	RpL34a		RPS11
	RpL34b		Ef1beta
	RpS5b		Prosalpha1
	Jabba		bic
	RpL29-RB		Mlp60A
	RpLP2-RB		Argk
	yps		RpL15
	lost		CG1677-RA
	tral		eEF1delta
	RpS6		Karybeta3
	CG3800		larp
	RpL36A		Cp18-RA
	HmgD		Nop60B
	CG8635		Yp3
	Cyt-c-p		His4r
	spin-RA		Tcp-1zeta
	RpL4		RpL5
	CG11213-RA		CG3760-RB
	RpLP0		Psa
	RpS26		RpS3
	Ahcy89E		26-29-p
	Nap1		aru
	RpL18		GstD1
	RpL24		FKBP59
	RpL36		Aats-val-RA
	RpL10		sqh
	RpS19a		RpS10b
			RpS23
			RpS16
			RpS21
			p47
			ERP60
			CG10306
			Fdh
			eIF-5A
			nop5
			Dek
			Pgk
			RpLP1
			Tango7
			RpS12
			eIF6
			pr
			Map205
			Fim
			Crc
			alphaTub67C
			Tpi
			CG2867
			Gapdh1
			RpL7A
			EF2
			Gp93
			RpL23A
			endos
			Gdi
			Ald-RC
			Akap200
			eIF3-S5-1
			CG3098
			porin
			Hsp27
			RpS2
			msk
			RpL23
			Fbp2
			RpL35A
			Cct5
			Adh
			Orc5
			Prosalpha3
			La-RB
			GlyP
			RpS28b
			Su(var)205
			Pdi
			CG6937-RA
			Pgam5
			Arf102F
			Vha13
			Uba1
			Hsc70-4-RA
			PCNA
			Tctp-RA
			tsr
			CG6767
			Uch
			Pglym78
			14-3-3epsilon-RD
			Aats-thr
			CaBP1
			FK506-bp2-RA
			CG10576
			Hsp26
			HIP-R
			CG1633
			sta
			CG8223
			GCS2beta
			Hop
			His3
			Cctgamma
			Hsp70Bbb-RA
			Obp99b
			Ahcy13
			CG2025
			T-cp1
			Nph
			Hsp83
			Rack1
			Vha55
			alphaTub85E
			Cam
			awd
			His2Av
			Adam
			RpS3A
			Srp68
			Ef1alpha48D
			Hsc70-3
			RpS27
			RpS24
			Ref1
			Ran
			fabp
			RpL18A
			CG30122-RB
			Hex-A
			Cyp1
			Pxt
			spn-D
			Nopp140
			Hel25E
			RpS5a
			Nlp
			Bacc
			Eno
			RpL22
			RpL26
			betaTub56D-RA
			Aats-asn
			Vha68-2
			Hsc70-1-RA
			Ef1gamma
			Gapdh2
			Lsd-2
			Idh
			His2B
			RpL12
			RpL10Ab
